# Supplementary material for: Hydrophobic Nanoporous Silver with ZIF Encapsulation for Nitrogen Reduction Electrocatalysis
Source: MDPI journal article supplement (doi:10.3390/molecules28062781), 2023-03-20
Supplement: s1 [file s1]

# Hydrophobic Nanoporous Silver with ZIF Encapsulation for Nitrogen Reduction Electrocatalysis

Yating Qi, Shulin Zhao, Yue Pang and Yijie Yang \*

Tianjin Key Laboratory of Structure and Performance for Functional Molecules, College of Chemistry,  
Tianjin Normal University, Tianjin 300387, China

\* Correspondence: hxyyyj@tjnu.edu.cn

**Figure S1.** TEM images of (a) NPS and (b) NPS@ZIF.

**Figure S2.** Characterization of NPS. (a) HAADF-STEM image of NPS and EDS mapping of elements (b) Ag, (c) Cl. (d) Corresponding EDS elemental spectrum.

**Figure S3.** XPS characterization of NPS.

**Figure S4.** IR spectra of NPS, ZIF and NPS@ZIF.

**Figure S5.** (a) Nitrogen sorption isotherms at 77 K. (b) Corresponding pore size distributions.

**Figure S6.** (a) Absorbance spectra of indophenol blue in  $\text{NH}_4^+$  solutions at various concentrations. (b) Linear correlation of the absorbance intensity to  $\text{NH}_4^+$  concentration.

**Figure S7.** (a) Absorbance spectra of  $\text{N}_2\text{H}_4$  solutions with various concentrations after reacting for 20 min at room temperature. (b) Corresponding calibration curve. (c) Yield of ammonia and hydrazine generated during ENRR at -1.0 V vs. RHE.

**Figure S8.** TEM image of NPS@ZIF after long-term electrocatalysis.

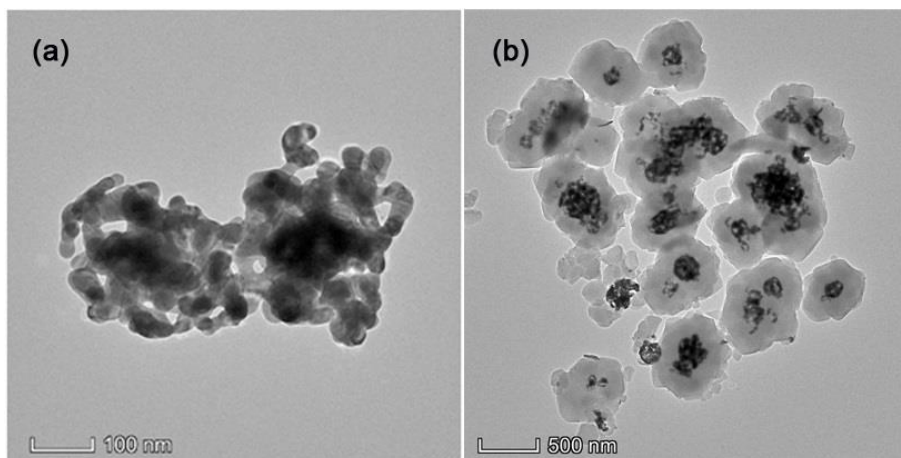

**Figure S1.** TEM images of (a) NPS and (b) NPS@ZIF.

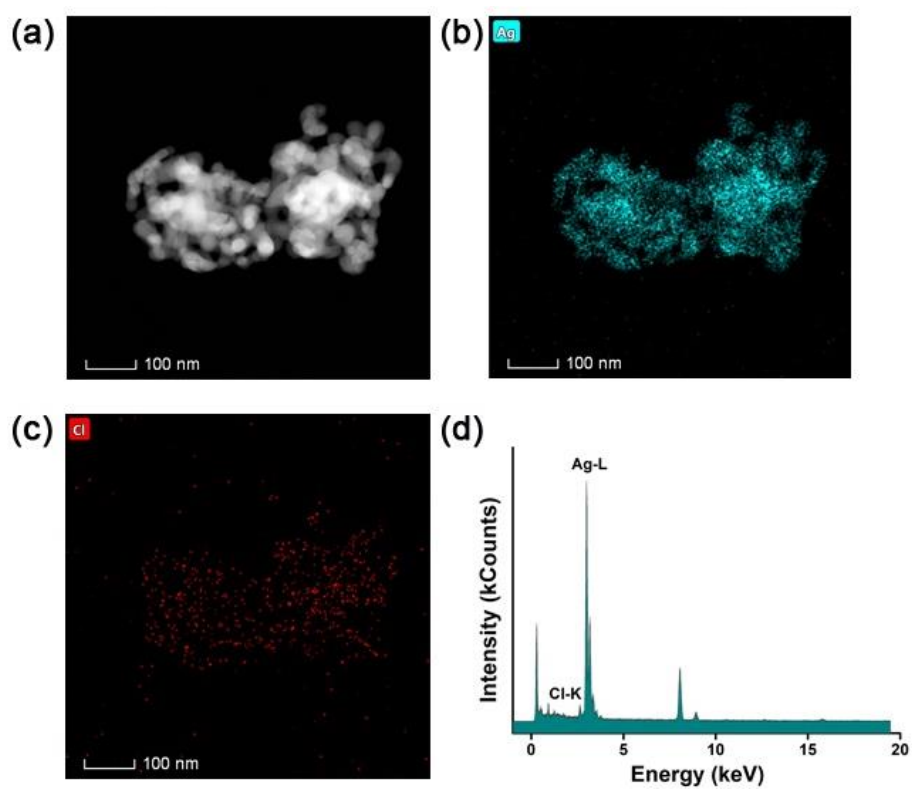

**Figure S2.** Characterization of NPS. (a) HAADF-STEM image of NPS and EDS mapping of elements (b) Ag, (c) Cl. (d) Corresponding EDS elemental spectrum.

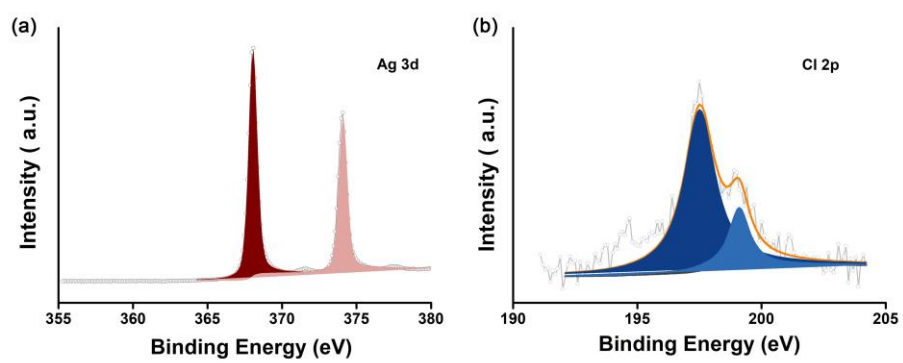

**Figure S3.** XPS characterization of NPS.

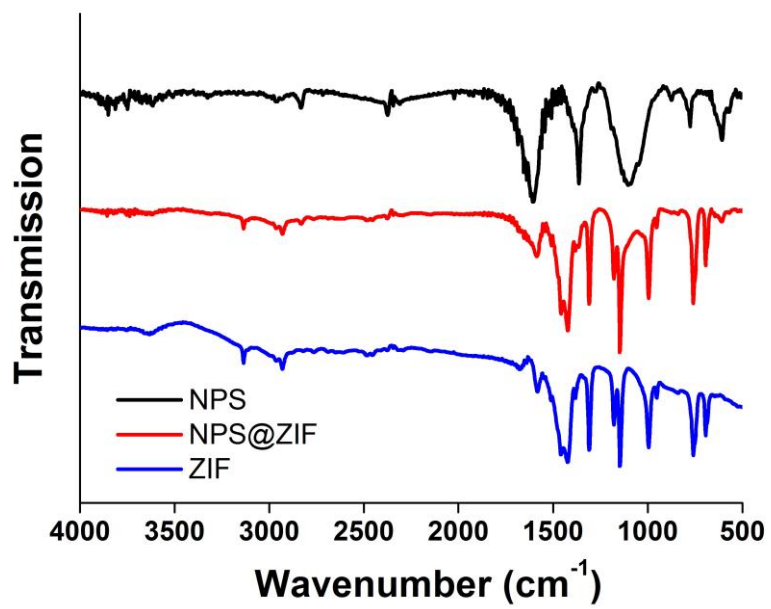

**Figure S4.** IR spectra of NPS, ZIF and NPS@ZIF.

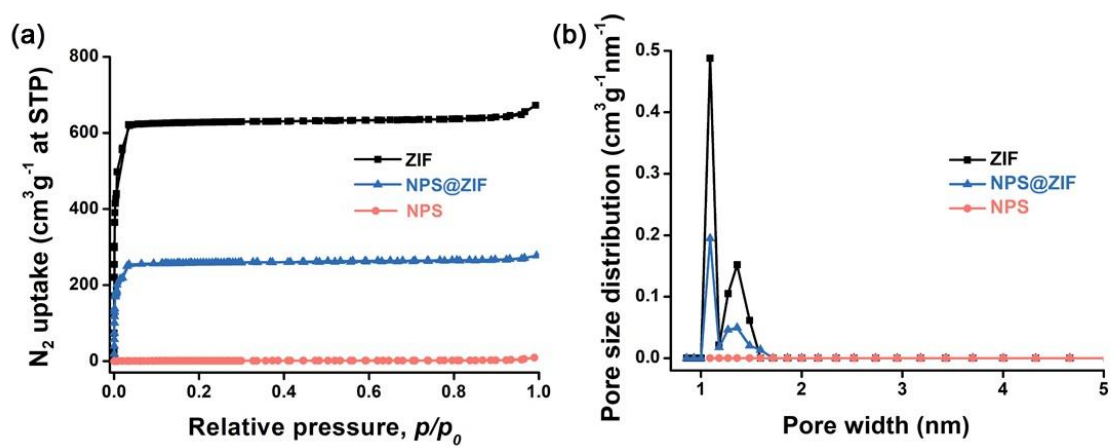

Figure S5. (a) Nitrogen sorption isotherms at 77 K. (b) Corresponding pore size distributions.

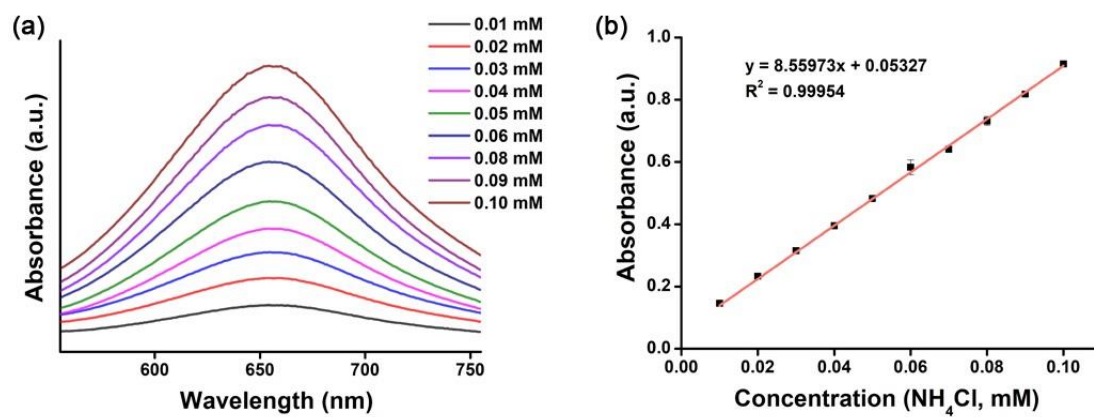

**Figure S6.** (a) Absorbance spectra of indophenol blue in  $\text{NH}_4^+$  solutions at various concentrations. (b) Linear correlation of the absorbance intensity to  $\text{NH}_4^+$  concentration.

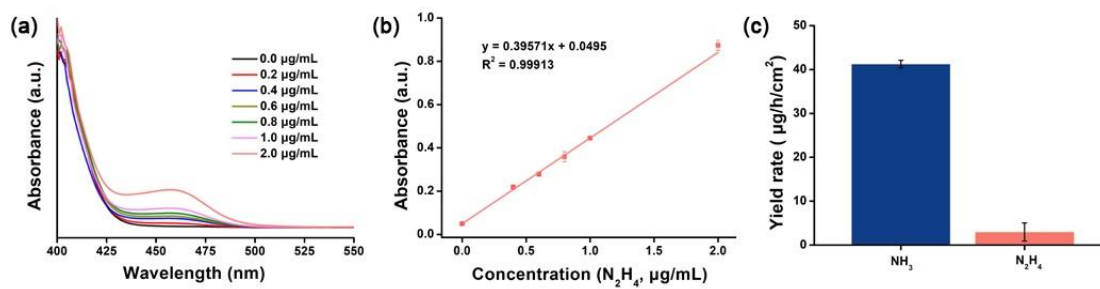

**Figure S7.** (a) Absorbance spectra of  $\text{N}_2\text{H}_4$  solutions with various concentrations after reacting for 20 min at room temperature. (b) Corresponding calibration curve. (c) Yield of ammonia and hydrazine generated during ENRR at -1.0 V vs. RHE.



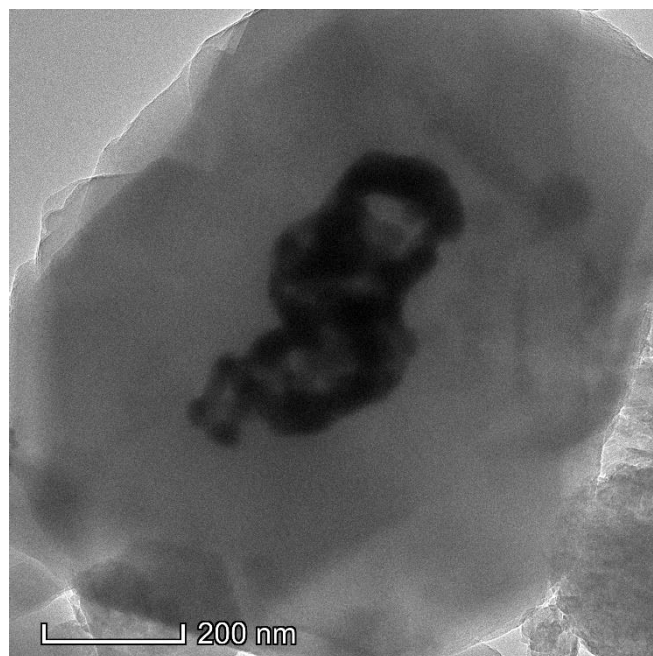

**Figure S8.** TEM image of NPS@ZIF after long-term electrocatalysis.
